# Supplementary material
Source: PubMed Central journal article supplement (PMC5070747)
Supplement: aasm.39.11.1927s1.pdf [file aasm.39.11.1927s1.pdf]

**Table S1.** Pearson correlation coefficients for sleep variables. MESA study

|                              | Average sleep duration (h) | Average sleep efficiency (%) | Insomnia symptoms (score) | Nap time (h)           | AHI                    |
|------------------------------|----------------------------|------------------------------|---------------------------|------------------------|------------------------|
| Average sleep duration (h)   | –                          | 0.32****<br>(n = 527)        | -0.03<br>(n = 518)        | -0.35****<br>(n = 527) | -0.12***<br>(n = 476)  |
| Average sleep efficiency (%) |                            | –                            | -0.07<br>(n = 518)        | 0.04<br>(n = 527)      | -0.17****<br>(n = 476) |
| Insomnia symptoms (score)    |                            |                              | –                         | 0.07<br>(n = 518)      | -0.07<br>(n = 470)     |
| Nap time (h)                 |                            |                              |                           | –                      | 0.08<br>(n = 476)      |
| AHI                          |                            |                              |                           |                        | –                      |

Average sleep duration (h): Mean = 6.4 ; Min = 3.1; Max = 8.9

Average sleep efficiency (%): Mean = 89.4; Min = 71.6 ; Max = 97.0

Insomnia symptoms (score): Mean = 8; Min = 0; Max = 20

Average sleep time in naps (h): Mean = 0.7; Min = 0.0; Max = 5.5

AHI = all apneas and hypopnea per hour of sleep: Mean = 23.0; Min = 0; Max = 94.3

\*\*\*p < 0.01, \*\*\*\*p < 0.0001

**Table S2.** Mean differences in log transformed **heart rate (HR)** and log transformed **HF-HRV** at baseline and mean differences in responses to mental stress challenge by sleep duration at **7 hours cut point** (n = 3,450 observations, 527 persons)

|                                                     | Sleep Duration (< 7 h vs. ≥ 7 h (reference)) |                   |                                  |                  |
|-----------------------------------------------------|----------------------------------------------|-------------------|----------------------------------|------------------|
|                                                     | HR (log (beats/min))                         |                   | HF-HRV (log(msec <sup>2</sup> )) |                  |
|                                                     | Mean Differences                             | 95% CI            | Mean Differences                 | 95% CI           |
| <b>Baseline</b>                                     |                                              |                   |                                  |                  |
| Model 1                                             | 0.0269                                       | (-0.0024 0.0561)  | -0.33                            | (-0.60, -0.07)** |
| Model 2                                             | 0.0252                                       | (-0.0047 0.0551)  | -0.28                            | (-0.54, -0.03)** |
| Model 3                                             | 0.0280                                       | (-0.0036 0.0596)  | -0.30                            | (-0.57, -0.03)** |
| Model 4                                             | 0.0287                                       | (-0.0033 0.0606)  | -0.31                            | (-0.58, -0.04)** |
| <b>Reactivity to Mental Stress<sup>1</sup></b>      |                                              |                   |                                  |                  |
| Model 1                                             | 0.0094                                       | (-0.0002 0.0191)* | -0.09                            | (-0.24, 0.06)    |
| Model 2                                             | 0.0107                                       | (0.0012 0.0202)** | -0.09                            | (-0.25, 0.06)    |
| Model 3                                             | 0.0105                                       | (0.0003 0.0206)** | -0.10                            | (-0.26, 0.07)    |
| Model 4                                             | 0.0099                                       | (-0.0002 0.0201)* | -0.11                            | (-0.28, 0.05)    |
| <b>Recovery from Mental Stress<sup>2</sup></b>      |                                              |                   |                                  |                  |
| Model 1                                             | -0.0025                                      | (-0.0109 0.0058)  | 0.14                             | (0.01, 0.26)**   |
| Model 2                                             | -0.0034                                      | (-0.0115 0.0047)  | 0.15                             | (0.02, 0.27)**   |
| Model 3                                             | -0.0022                                      | (-0.0107 0.0063)  | 0.14                             | (0.02, 0.27)**   |
| Model 4                                             | -0.0016                                      | (-0.0101 0.0070)  | 0.15                             | (0.02, 0.28)**   |
| <b>Reactivity to Orthostatic Stress<sup>3</sup></b> |                                              |                   |                                  |                  |
| Model 1                                             | 0.0033                                       | (-0.0087 0.0154)  | 0.05                             | (-0.15, 0.25)    |
| Model 2                                             | 0.0038                                       | (-0.0088 0.0165)  | 0.06                             | (-0.15, 0.26)    |
| Model 3                                             | 0.0054                                       | (-0.0079 0.0186)  | 0.04                             | (-0.16, 0.25)    |
| Model 4                                             | 0.0052                                       | (-0.0082 0.0186)  | 0.02                             | (-0.18, 0.23)    |

<sup>1</sup> Reactivity to mental stress by sleep duration = HR/HF-HRV at mental stress – HR/HF-HRV at baseline

<sup>2</sup> Recovery from mental stress by sleep duration = HR/HF-HRV at recovery – HR/HF-HRV at mental stress

<sup>3</sup> Reactivity to orthostatic stress by sleep duration = HR/HF-HRV at orthostatic stress – HR/HF-HRV at baseline

**Note:**

A more positive coefficient for the reactivity associated with shorter sleep means a greater HR increase in response to the stressor (greater reactivity); a more negative coefficient for recovery associated with shorter sleep means a greater HR recovery from the stressor

A more negative coefficient for the reactivity associated with shorter sleep means a greater HF-HRV reduction in response to the stressor, a more positive coefficient for recovery associated with shorter sleep means a greater increase in HF-HRV during recovery

Model 1 = age, gender, race/ethnicity, income-wealth index. Model 2 = model 1 plus body mass index, smoking, alcohol consumption, medications (antihypertensive, antidepressants, sympatho-mimetic medications and medication for sleep and mood), diabetes and sleep efficiency. Model 3 = model 2 plus sleep apnea. Model 4 = model 3 plus naps (h/day)

\*p < 0.1, \*\*p < 0.05

**Table S3.** Mean differences in log transformed **heart rate (HR)** at baseline and mean differences in responses to mental stress challenge by sleep duration at <6 h and 6-6.9 h vs.  $\geq$  7-8.9 h (n= 3,232 observations and 493 participants†).

|                                                     | < 6 h vs. $\geq$ 7-8.9 h (ref) |                  | 6 – 6.9 h vs. $\geq$ 7-8.9 h (ref) |                 |
|-----------------------------------------------------|--------------------------------|------------------|------------------------------------|-----------------|
|                                                     | Mean Differences               | 95% CI           | Mean Differences                   | 95% CI          |
| <b>Baseline</b>                                     |                                |                  |                                    |                 |
| Model 1                                             | 0.043                          | (0.007, 0.080)** | 0.023                              | (-0.012, 0.057) |
| Model 2                                             | 0.042                          | (0.004, 0.080)** | 0.018                              | (-0.018, 0.053) |
| Model 3                                             | 0.050                          | (0.010, 0.089)** | 0.017                              | (-0.020, 0.054) |
| Model 4                                             | 0.054                          | (0.013, 0.096)** | 0.017                              | (-0.020, 0.054) |
| <b>Reactivity to Mental Stress<sup>1</sup></b>      |                                |                  |                                    |                 |
| Model 1                                             | 0.011                          | (-0.001, 0.022)* | 0.008                              | (-0.004, 0.019) |
| Model 2                                             | 0.013                          | (0.001, 0.025)** | 0.010                              | (-0.002, 0.021) |
| Model 3                                             | 0.010                          | (-0.002, 0.023)  | 0.010                              | (-0.002, 0.021) |
| Model 4                                             | 0.009                          | (-0.004, 0.023)  | 0.009                              | (-0.002, 0.021) |
| <b>Recovery from Mental Stress<sup>2</sup></b>      |                                |                  |                                    |                 |
| Model 1                                             | -0.001                         | (-0.012, 0.011)  | -0.003                             | (-0.014, 0.008) |
| Model 2                                             | -0.003                         | (-0.015, 0.009)  | -0.005                             | (-0.016, 0.007) |
| Model 3                                             | -0.001                         | (-0.013, 0.012)  | -0.004                             | (-0.015, 0.008) |
| Model 4                                             | 0.002                          | (-0.012, 0.015)  | -0.004                             | (-0.015, 0.008) |
| <b>Reactivity to Orthostatic Stress<sup>3</sup></b> |                                |                  |                                    |                 |
| Model 1                                             | 0.008                          | (-0.001, 0.018)* | 0.004                              | (-0.005, 0.013) |
| Model 2                                             | 0.010                          | (0.001, 0.020)** | 0.005                              | (-0.004, 0.015) |
| Model 3                                             | 0.013                          | (0.003, 0.024)** | 0.006                              | (-0.004, 0.015) |
| Model 4                                             | 0.015                          | (0.004, 0.025)** | 0.006                              | (-0.004, 0.015) |

†Sample does not include 34 participants who had **CVD event** (definitive angina pectoris, definitive myocardial infarction, percutaneous transluminal coronary angioplasty, coronary bypass graft or stroke)

<sup>1</sup> Reactivity to mental stress by sleep duration = HR at mental stress – HR at baseline

<sup>2</sup> Recovery from mental stress by sleep duration = HR at recovery – HR at mental stress

<sup>3</sup> Reactivity to orthostatic stress by sleep duration = HR at orthostatic stress – HR at baseline

**Note:** A more positive coefficient for the reactivity associated with shorter sleep duration means a greater increase in HR response to the stressor (greater reactivity); a more negative coefficient for recovery associated with shorter sleep duration means a greater HR recovery from the stressor

Model 1 = age, gender, race/ethnicity, income-wealth index.

Model 2 = model 1 plus body mass index, smoking, alcohol consumption, medications (antihypertensive, antidepressants, sympatho-mimetic medications and medication for sleep and mood), diabetes and sleep efficiency.

Model 3 = model 2 plus sleep apnea.

Model 4 = model 3 plus naps (h/day)

\*p < 0.1, \*\*p < 0.05, \*\*\*p < 0.01

**Table S4.** Mean differences in log-transformed **HF-HRV** (log (msec<sup>2</sup>)) at baseline and mean differences in responses to mental stress challenge by sleep efficiency (low vs.higher) (n = 3,232 observations 493 persons†) .

|                                                     | HF-HRV           |                    |
|-----------------------------------------------------|------------------|--------------------|
|                                                     | Mean differences | (95% CI)           |
| <b>Baseline</b>                                     |                  |                    |
| Model 1                                             | -0.641           | (-1.116 -0.166)*** |
| Model 2                                             | -0.624           | (-1.072 -0.176)*** |
| Model 3                                             | -0.630           | (-1.099 -0.161)*** |
| Model 4                                             | -0.620           | (-1.091 -0.148)**  |
| <b>Reactivity to Mental Stress<sup>1</sup></b>      |                  |                    |
| Model 1                                             | 0.046            | (-0.177 0.270)     |
| Model 2                                             | 0.070            | (-0.164 0.304)     |
| Model 3                                             | 0.209            | (-0.005 0.423)*    |
| Model 4                                             | 0.222            | (0.008 0.437)**    |
| <b>Recovery from Mental Stress<sup>2</sup></b>      |                  |                    |
| Model 1                                             | -0.061           | (-0.236 0.113)     |
| Model 2                                             | -0.085           | (-0.273 0.102)     |
| Model 3                                             | -0.132           | (-0.329 0.066)     |
| Model 4                                             | -0.133           | (-0.331 0.064)     |
| <b>Reactivity to Orthostatic Stress<sup>3</sup></b> |                  |                    |
| Model 1                                             | -0.086           | (-0.307 0.135)     |
| Model 2                                             | -0.039           | (-0.268 0.189)     |
| Model 3                                             | 0.031            | (-0.217 0.278)     |
| Model 4                                             | 0.047            | (-0.207 0.300)     |

†Sample does not include 34 participants who had **CVD event** (definitive angina pectoris, definitive myocardial infarction, percutaneous transluminal coronary angioplasty, coronary bypass graft or stroke)

<sup>1</sup> Reactivity to mental stress by sleep duration = HF-HRV at mental stress - HF-HRV at baseline

<sup>2</sup> Recovery from mental stress by sleep duration = HF-HRV at recovery - HF-HRV at mental stress

<sup>3</sup> Reactivity to orthostatic stress by sleep duration = HF-HRV at orthostatic stress - HF-HRV at baseline

**Note:** For example

For HRV, a more negative coefficient for the reactivity associated with shorter sleep means a greater reduction in HF-HRV response to the stressor, a more positive coefficient for recovery associated with shorter sleep means a greater increase in HF-HRV during recovery.

Model 1 = age, gender, race/ethnicity, income-wealth index and respiratory rate

Model 2 = model 1 plus body mass index, smoking, alcohol consumption, medications (antihypertensive, antidepressants, sympatho-mimetic medications and medication for sleep and mood), diabetes and sleep efficiency.

Model 3 = model 2 plus sleep apnea.

Model 4 = model 3 plus naps (h/day)

\*p < 0.1, \*\*p < 0.05, \*\*\*p < 0.01

**Table S5.** Mean differences in log transformed **heart rate (HR)** (log (beats/min)) at baseline and mean differences in responses to mental stress challenge associated with sleep duration and insomnia with longer sleep duration with no insomnia ( $\geq 7$  h sleep with no insomnia<sup>†</sup>) as reference.

|                                                     | $\geq 7$ h sleep with insomnia<br>Mean differences (95% CI) |         |        | $< 7$ h sleep with no insomnia<br>Mean differences (95% CI) |         |           | $< 7$ h sleep with insomnia<br>Mean differences (95% CI) |         |           |
|-----------------------------------------------------|-------------------------------------------------------------|---------|--------|-------------------------------------------------------------|---------|-----------|----------------------------------------------------------|---------|-----------|
| <b>Baseline</b>                                     |                                                             |         |        |                                                             |         |           |                                                          |         |           |
| Model 1                                             | 0.0124                                                      | (-0.039 | 0.064) | 0.0286                                                      | (-0.009 | 0.066)    | 0.0402                                                   | (-0.002 | 0.082)    |
| Model 2                                             | 0.0107                                                      | (-0.041 | 0.062) | 0.0246                                                      | (-0.013 | 0.063)    | 0.0338                                                   | (-0.009 | 0.077)    |
| Model 3                                             | -0.0028                                                     | (-0.057 | 0.052) | 0.0214                                                      | (-0.018 | 0.061)    | 0.0290                                                   | (-0.016 | 0.074)    |
| Model 4                                             | -0.0030                                                     | (-0.057 | 0.051) | 0.0219                                                      | (-0.018 | 0.062)    | 0.0305                                                   | (-0.015 | 0.076)    |
| <b>Mental stress reactivity<sup>1</sup></b>         |                                                             |         |        |                                                             |         |           |                                                          |         |           |
| Model 1                                             | 0.0021                                                      | (-0.014 | 0.018) | 0.0116                                                      | 0.000   | 0.023)*   | 0.0107                                                   | (-0.003 | 0.024)    |
| Model 2                                             | 0.0015                                                      | (-0.014 | 0.018) | 0.0127                                                      | 0.001   | 0.024)*** | 0.0128                                                   | (-0.001 | 0.026)*   |
| Model 3                                             | -0.0003                                                     | (-0.017 | 0.017) | 0.0104                                                      | (-0.002 | 0.023)    | 0.0147                                                   | (0.001  | 0.029)**  |
| Model 4                                             | -0.0002                                                     | (-0.017 | 0.017) | 0.0102                                                      | (-0.002 | 0.023)    | 0.0141                                                   | (0.000  | 0.028)*   |
| <b>Recovery from Mental Stress<sup>2</sup></b>      |                                                             |         |        |                                                             |         |           |                                                          |         |           |
| Model 1                                             | 0.0053                                                      | (-0.011 | 0.021) | -0.0032                                                     | (-0.015 | 0.008)    | 0.0016                                                   | (-0.012 | 0.015)    |
| Model 2                                             | 0.0059                                                      | (-0.010 | 0.022) | -0.0043                                                     | (-0.016 | 0.007)    | 0.0001                                                   | (-0.013 | 0.013)    |
| Model 3                                             | 0.0075                                                      | (-0.009 | 0.024) | -0.0016                                                     | (-0.014 | 0.011)    | -0.0002                                                  | (-0.014 | 0.014)    |
| Model 4                                             | 0.0073                                                      | (-0.010 | 0.024) | -0.0012                                                     | (-0.014 | 0.011)    | 0.0010                                                   | (-0.013 | 0.015)    |
| <b>Reactivity to Orthostatic Stress<sup>3</sup></b> |                                                             |         |        |                                                             |         |           |                                                          |         |           |
| Model 1                                             | 0.0117                                                      | (-0.002 | 0.025) | 0.0059                                                      | (-0.004 | 0.015)    | 0.0128                                                   | (0.002  | 0.024)**  |
| Model 2                                             | 0.0108                                                      | (-0.003 | 0.024) | 0.0068                                                      | (-0.003 | 0.017)    | 0.0156                                                   | (0.005  | 0.027)*** |
| Model 3                                             | 0.0115                                                      | (-0.003 | 0.025) | 0.0086                                                      | (-0.002 | 0.019)    | 0.0172                                                   | (0.006  | 0.029)*** |
| Model 4                                             | 0.0115                                                      | (-0.003 | 0.025) | 0.0086                                                      | (-0.002 | 0.019)    | 0.0175                                                   | (0.006  | 0.029)*** |

<sup>1</sup> Reactivity to mental stress by sleep duration = HR at mental stress – HR at baseline

<sup>2</sup> Recovery from mental stress by sleep duration = HR at recovery – HR at mental stress

<sup>3</sup> Reactivity to orthostatic stress by sleep duration = HR at orthostatic stress – HR at baseline

Model 1 = age, gender, race/ethnicity, income-wealth index. Model 2 = model 1 plus body mass index, smoking, alcohol consumption, medications (antihypertensive, antidepressants, sympatho-mimetic medications and medication for sleep and mood), diabetes and sleep efficiency. Model 3 = model 2 plus sleep apnea. Model 4 = model 3 plus naps (h/day)

<sup>†</sup>  $< 7$  hours sleep with insomnia = 3-6.9 hours/night with insomnia,  
 $< 7$  hours sleep with no insomnia = 3-6.9 hours/night with no insomnia,  
 $\geq 7$  hours sleep with insomnia = 7-8.9 hours/night with insomnia, and  
 $\geq 7$  hours sleep with no insomnia = 7-8.9 hours/night with no insomnia (reference group)

\* $p < 0.1$ , \*\* $p < 0.05$ , \*\*\* $p < 0.01$

**Table S6.** Mean differences in log transformed **HF-HRV** at baseline and mean differences in responses to mental stress challenge associated with sleep duration and insomnia with longer sleep duration with no insomnia ( $\geq 7$  h sleep with no insomnia<sup>†</sup>) as reference group.

|                                                     | $\geq 7$ h sleep with insomnia<br>Mean differences (95% CI) |         |           | $< 7$ h sleep with no insomnia<br>Mean differences (95% CI) |         |           | $< 7$ h sleep with insomnia<br>Mean differences (95% CI) |         |           |
|-----------------------------------------------------|-------------------------------------------------------------|---------|-----------|-------------------------------------------------------------|---------|-----------|----------------------------------------------------------|---------|-----------|
| <b>Baseline</b>                                     |                                                             |         |           |                                                             |         |           |                                                          |         |           |
| Model 1                                             | -0.004                                                      | (-0.443 | 0.435)    | -0.360                                                      | (-0.679 | -0.042)** | -0.397                                                   | (-0.756 | -0.037)** |
| Model 2                                             | 0.013                                                       | (-0.425 | 0.451)    | -0.301                                                      | (-0.624 | 0.021)*   | -0.317                                                   | (-0.683 | 0.049)*   |
| Model 3                                             | 0.024                                                       | (-0.432 | 0.479)    | -0.286                                                      | (-0.619 | 0.048)*   | -0.265                                                   | (-0.642 | 0.113)    |
| Model 4                                             | 0.025                                                       | (-0.431 | 0.481)    | -0.290                                                      | (-0.624 | 0.045)*   | -0.276                                                   | (-0.660 | 0.108)    |
| <b>Mental stress reactivity<sup>1</sup></b>         |                                                             |         |           |                                                             |         |           |                                                          |         |           |
| Model 1                                             | -0.251                                                      | (-0.490 | -0.011)** | -0.146                                                      | (-0.319 | 0.028)    | -0.228                                                   | (-0.424 | -0.032)** |
| Model 2                                             | -0.246                                                      | (-0.488 | -0.005)** | -0.153                                                      | (-0.330 | 0.024)    | -0.225                                                   | (-0.426 | -0.023)** |
| Model 3                                             | -0.242                                                      | (-0.499 | 0.015)*   | -0.153                                                      | (-0.340 | 0.035)    | -0.253                                                   | (-0.466 | -0.041)** |
| Model 4                                             | -0.238                                                      | (-0.495 | 0.019)*   | -0.163                                                      | (-0.351 | 0.025)    | -0.286                                                   | (-0.502 | -0.069)** |
| <b>Recovery from Mental Stress<sup>2</sup></b>      |                                                             |         |           |                                                             |         |           |                                                          |         |           |
| Model 1                                             | 0.194                                                       | (-0.046 | 0.433)    | 0.187                                                       | (0.014  | 0.361)**  | 0.250                                                    | 0.053   | 0.447)**  |
| Model 2                                             | 0.188                                                       | (-0.054 | 0.429)    | 0.202                                                       | (0.025  | 0.380)**  | 0.242                                                    | 0.040   | 0.444)**  |
| Model 3                                             | 0.141                                                       | (-0.115 | 0.398)    | 0.178                                                       | (-0.010 | 0.366)*   | 0.241                                                    | 0.028   | 0.454)**  |
| Model 4                                             | 0.140                                                       | (-0.117 | 0.396)    | 0.182                                                       | (-0.006 | 0.370)*   | 0.252                                                    | 0.035   | 0.469)**  |
| <b>Reactivity to Orthostatic Stress<sup>3</sup></b> |                                                             |         |           |                                                             |         |           |                                                          |         |           |
| Model 1                                             | -0.236                                                      | (-0.477 | 0.005)    | 0.027                                                       | (-0.144 | 0.199)    | -0.164                                                   | (-0.358 | 0.031)*   |
| Model 2                                             | -0.197                                                      | (-0.440 | 0.046)    | 0.036                                                       | (-0.139 | 0.210)    | -0.169                                                   | (-0.368 | 0.029)*   |
| Model 3                                             | -0.247                                                      | (-0.501 | 0.007)    | 0.018                                                       | (-0.166 | 0.202)    | -0.196                                                   | (-0.405 | 0.013)*   |
| Model 4                                             | -0.245                                                      | (-0.499 | 0.009)    | 0.001                                                       | (-0.183 | 0.186)    | -0.236                                                   | (-0.448 | -0.024)** |

<sup>1</sup> Reactivity to mental stress by sleep duration = HF-HRV at mental stress – HF-HRV at baseline

<sup>2</sup> Recovery from mental stress by sleep duration = HF-HRV at recovery – HF-HRV at mental stress

<sup>3</sup> Reactivity to orthostatic stress by sleep duration = HF-HRV at orthostatic stress – HF-HRV at baseline

Model 1 = age, gender, race/ethnicity, income-wealth index. Model 2 = model 1 plus body mass index, smoking, alcohol consumption, medications (antihypertensive, antidepressants, sympatho-mimetic medications and medication for sleep and mood), diabetes and sleep efficiency. Model 3 = model 2 plus sleep apnea. Model 4 = model 3 plus naps (h/day)

†  $< 7$  hours sleep with insomnia = 3-6.9 hours/night with insomnia,  
 $< 7$  hours sleep with no insomnia = 3-6.9 hours/night with no insomnia,  
 $\geq 7$  hours sleep with insomnia = 7-8.9 hours/night with insomnia, and  
 $\geq 7$  hours sleep with no insomnia = 7-8.9 hours/night with no insomnia (reference group)

\* $p < 0.1$ , \*\*  $p < 0.05$ , \*\*\* $p < 0.01$
